# Supplementary material
Source: PubMed Central journal article supplement (PMC3237768)
Supplement: NIHMS329998-supplement-1.pdf [file NIHMS329998-supplement-1.pdf]

**Supplemental Table 1. Synergistic index of combination treatment with cixutumumab and C225 or rapamycin in MTS assay.** LN686 and SqCCY1 cells grown in PCP were treated with indicated concentration of cixutumumab, C225, and rapamycin or their combinations for 3 days. Abbreviation: MGI, mean growth inhibition rate = growth rate of treated group/growth rate of untreated group. \*Calculated by dividing the expected growth inhibition rate by the observed growth inhibition rate. An index more than 1 indicates synergistic effect and <1 indicates less than additive effect. † *p* value (two-sided) was calculated by *t* test compared with no treatment. ‡Growth inhibition rate of treatment A x growth inhibition rate of treatment. §Growth inhibition rate of combined treatment on treatments A and B.

**Supplemental Table 2. Synergistic index of combination treatment with cixutumumab and C225 in soft agar assay.** SqCC/Y1, LN686, UMSCC2, FADU, H226B, H226Br. H460, and H596 cell grown in soft agar were treated with indicated concentration of cixutumumab, C225, or their combination. Abbreviation: MGI, mean growth inhibition rate = growth rate of treated group/growth rate of untreated group. \*Calculated by dividing the expected growth inhibition rate by the observed growth inhibition rate. An index more than 1 indicates synergistic effect and <1 indicates less than additive effect. † *p* value (two-sided) was calculated by *t* test compared with no treatment. ‡Growth inhibition rate of treatment A x growth inhibition rate of treatment. §Growth inhibition rate of combined treatment on treatments A and B.

### **Supplemental Figure Legends**

**Supplemental Figure 1. Specific inhibition of IGF-I-mediated IGF-1R phosphorylation by cixutumumab.** Serum-starved LN686 cells in PCP were pretreated with cixutumumab (25 µg/ml) for 6 h and then stimulated with IGF-I (100

ng/ml) or insulin (100 nM) for 30 min. Cell lysates were analyzed by using Western blot analysis.

**Supplemental Figure 2.** Cixutumumab-resistant (red-colored) and –sensitive (black-colored) 4 HNSCC and 6 NSCLC cells lines cultured in PCP were analyzed for pIGF-1R, IGF-1R, pEGFR, EGFR, and Actin expressions by using Western blot analysis.

Densitometric analysis was performed to quantify band intensity. pIGF-1R (A), IGF-1R (B), pEGFR (C), and EGFR (D) expression levels normalized by Actin expression level are shown.

**Supplemental Figure 3. Rapamycin inhibits mTOR and proliferative activities in**

**cixutumumab-resistant HNSCC cells.** A, LN686 and OSC19 cells grown in PCP was treated with rapamycin indicated dose for 6h and then stimulated with 10% FBS for 30 min. pmTOR (Y2248) and mTOR were analyzed using Western blot. B, LN686 and SqCC/Y1 cells under PCP were treated with indicated rapamycin concentrations for 3 days and then measured cell viability by using MTS reagents Student's t test, average  $\pm$  SD;  $n=4$   $p<0.05$  and  $p<0.001$ .

**Supplemental Figure 4. C225 blocks the axis of EGFR signaling.** A, LN686 cells

grown in PCPs were treated with indicated doses of C225 for 6h and then stimulated with 10% FBS for 30 min. pEGFR (Y1068) and EGFR were analyzed using Western blot. B, LN686 and SqCCC/Y1 cells grown in PCP in the presence of indicated concentrations of C225 for 3 days were subjected to MTS assay. Student's t test, average  $\pm$  SD;  $n=6$   $p<0.05$  and  $p<0.001$ .

**Supplemental Figure 5. The combined treatment with cixutumumab and C225 significantly decreased cixutumumab induced the activities of EGFR, Akt, and mTOR and activated caspase 3.** LN686 and FADU HNSCC cell lines grown in PCPs were treated with cixutumumab (25  $\mu\text{g/ml}$ ), C225 (25  $\mu\text{g/ml}$ ), or their combination for 3 days and then stimulated with IGF-1 (100 ng/ml) for 30 min. Cell lysates were prepared and subject to immunoblotting analysis.

**Supplemental figure 6. Potentiation of proapoptotic effect of cixutumumab by combined treatment with LY294002 or erlotinib.** LN686 cells were treated with cixutumumab (25  $\mu\text{g/ml}$ ) alone or in combination with LY294002 (10  $\mu\text{M}$ ) or erlotinib (100 nM) for 3 days. Cell lysates were prepared and analyzed by Western blot.

### Supplementary Table 1.

Synergistic indices of combination treatment with cixutumumab and rapamycin

| Additive and Synergistic effect |                 |          |      |                      |             |          |      |                      |                       |                       |                      |                    |
|---------------------------------|-----------------|----------|------|----------------------|-------------|----------|------|----------------------|-----------------------|-----------------------|----------------------|--------------------|
| Cell lines                      | Treatment A     |          |      |                      | Treatment B |          |      |                      | Combination treatment |                       |                      | Index <sup>c</sup> |
|                                 | Drug            | Conc.    | MGI  | p-value <sup>†</sup> | Drug        | Conc.    | MGI  | p-value <sup>†</sup> | Expected <sup>‡</sup> | Observed <sup>§</sup> | p-value <sup>†</sup> |                    |
| LN686                           | Cixutu<br>mumab | 25 µg/ml | 0.87 | 0.040                | Rapamycin   | 1 µM     | 0.7  | 0.000                | 0.61                  | 0.29                  | 0.0001               | 2.10               |
| SqCC/Y1                         |                 |          | 0.88 | 0.072                |             |          | 0.79 | 0.008                | 0.70                  | 0.4                   | 0.0001               | 1.74               |
| LN686                           |                 |          | 0.84 | 0.018                | C225        | 25 µg/ml | 0.71 | 0.001                | 0.60                  | 0.46                  | 0.0023               | 1.30               |
| SqCC/Y1                         |                 |          | 0.89 | 0.043                |             |          | 0.77 | 0.006                | 0.69                  | 0.4                   | 0.0000               | 1.71               |

## Supplementary Table 2.

Synergistic indices of combination treatment with cixutumumab and C225

| Additive and Synergistic effect |                 |          |      |          |             |          |      |          |                       |           |          |        |
|---------------------------------|-----------------|----------|------|----------|-------------|----------|------|----------|-----------------------|-----------|----------|--------|
| Cell lines                      | Treatment A     |          |      |          | Treatment B |          |      |          | Combination treatment |           |          | Index* |
|                                 | Drug            | Conc.    | MGI  | p-value† | Drug        | Conc.    | MGI  | p-value† | Expected‡             | Observed§ | p-value† |        |
| SqCC/Y1                         | Cixutu<br>mumab | 25 µg/ml | 0.85 | 0.00282  | C225        | 25 µg/ml | 0.82 | 0.00052  | 0.70                  | 0.45      | 8.08E-09 | 1.55   |
| LN686                           |                 |          | 0.63 | 5.7E-06  |             |          | 0.71 | 7.9E-06  | 0.45                  | 0.37      | 1.87E-08 | 1.21   |
| UMSCC2                          |                 |          | 0.79 | 2.3E-05  |             |          | 0.74 | 2.9E-05  | 0.58                  | 0.52      | 2.84E-10 | 1.12   |
| FADU                            |                 |          | 0.54 | 0.00019  |             |          | 0.42 | 5E-05    | 0.23                  | 0.21      | 1.5E-06  | 1.08   |
| H226B                           |                 |          | 0.76 | 0.006    |             |          | 0.7  | 0.001    | 0.53                  | 0.4       | 5.57E-08 | 1.33   |
| H226Br                          |                 |          | 0.59 | 0.00014  |             |          | 0.68 | 0.00086  | 0.40                  | 0.34      | 1.77E-07 | 1.18   |
| H460                            |                 |          | 0.53 | 8.4E-08  |             |          | 0.64 | 3.2E-05  | 0.34                  | 0.32      | 9.1E-08  | 1.06   |
| H596                            |                 |          | 0.61 | 6.3E-08  |             |          | 0.59 | 1.2E-05  | 0.36                  | 0.31      | 1.29E-07 | 1.16   |

# Supplementary Figure 1

|   |   |   |   |   |                             |
|---|---|---|---|---|-----------------------------|
| - | - | + | - | + | Cixutumumab (25 $\mu$ g/ml) |
| - | + | + | - | - | IGF (100 ng/ml)             |
| - | - | - | + | + | Insulin (100 nM)            |

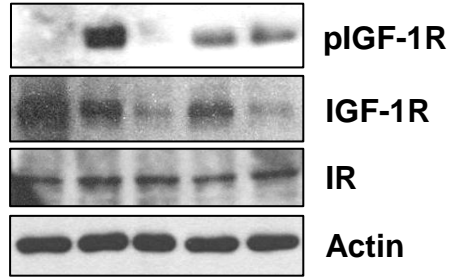

**A**

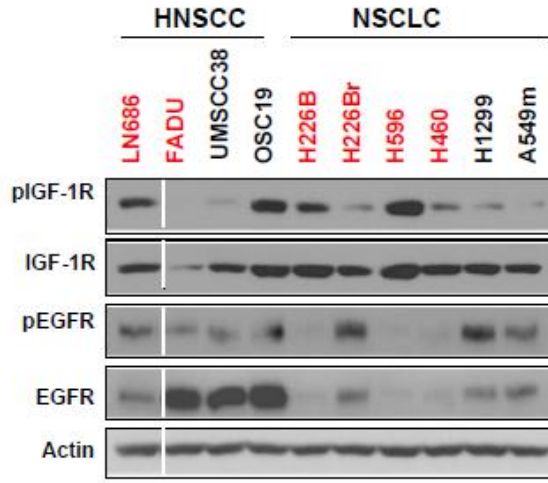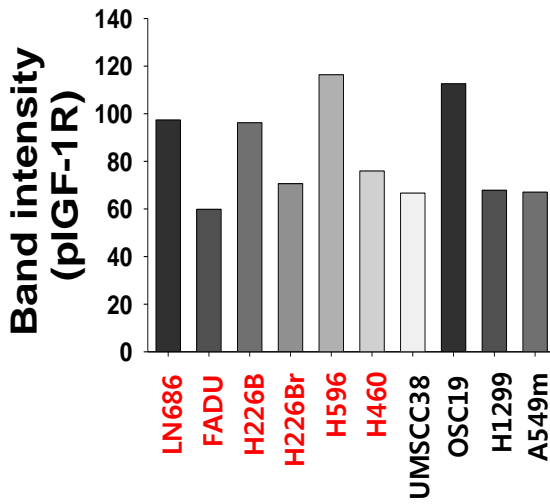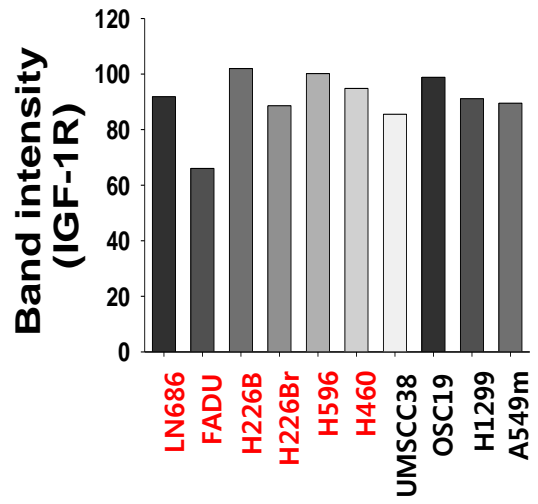

**B**

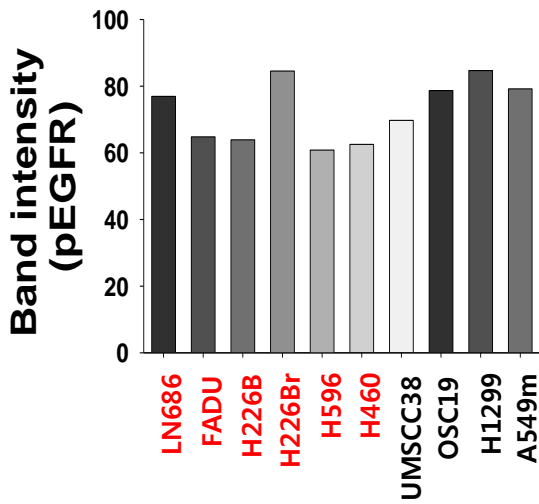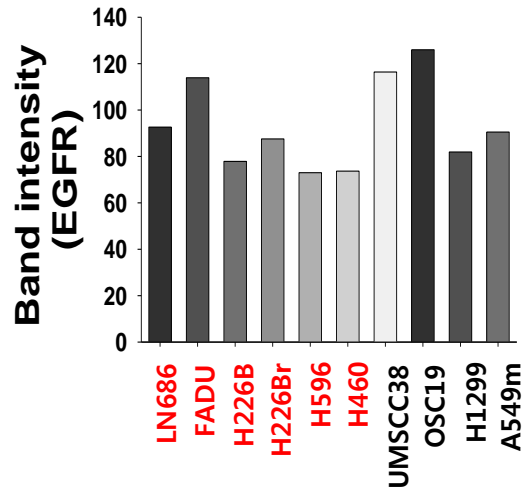

**A**

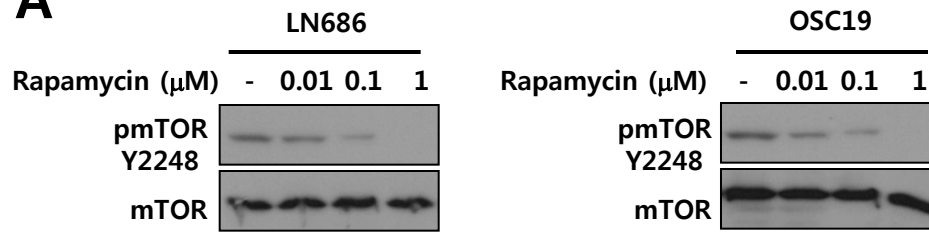

**B**

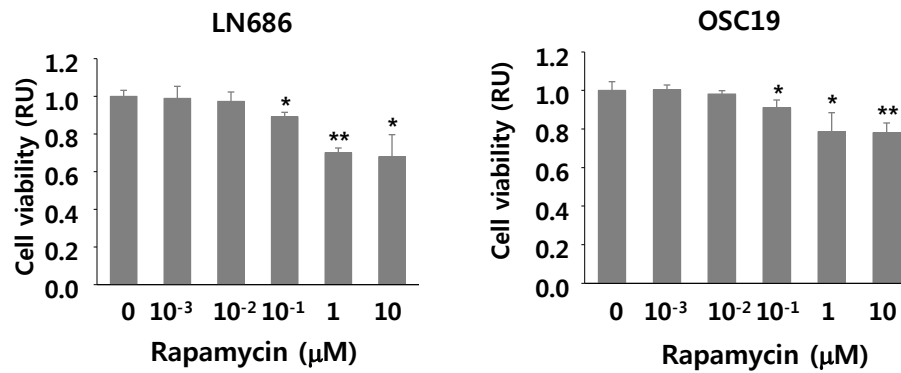





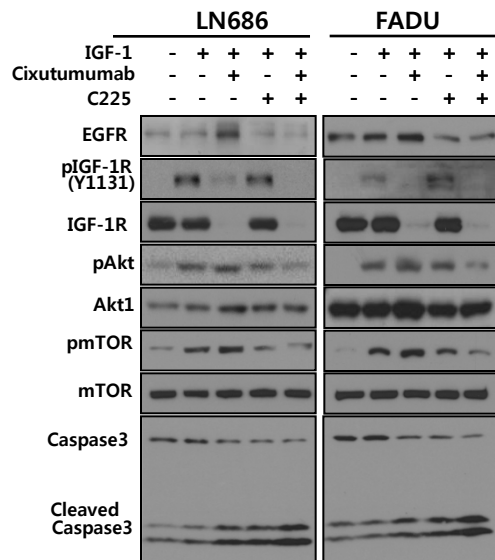

**Supplementary  
Figure 6**

|   |   |   |   |   |   |                               |
|---|---|---|---|---|---|-------------------------------|
| - | + | - | + | - | + | <b>Cixutumumab (25 µg/ml)</b> |
| - | - | + | + | - | - | <b>LY294002 (10 µM)</b>       |
| - | - | - | - | + | + | <b>Erlotinib (100 nM)</b>     |

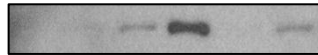

**Cleaved PARP**

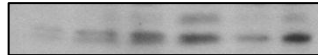

**Cleaved caspase-3**

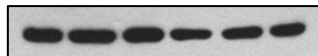

**Actin**
